# Supplementary material
Source: Research Square preprint supplement (doi:10.21203/rs.3.rs-9673054/v1)

Supplementary Figures:

**Fig. S1.** Genomic heritability estimates (h²g) for all traits at Arneberg, Løken, and quality (1st cut) datasets. Error bars represent approximate standard errors.

**Fig. S2.** Learning curves showing the effect of training population size (fraction of available training data) on GBLUP and Random Forest prediction accuracy for selected trait-dataset combinations.

**Fig. S3.** Effect of marker density on prediction accuracy for GBLUP and Random Forest. The x-axis shows the number of SNPs (log scale), and the y-axis shows mean cross-validation accuracy.

**Fig. S4.** Genomic correlation heatmaps between traits for (a) Arneberg yield, (b) Løken yield, and (c) quality 1st cut datasets. Values represent Pearson correlations between GEBVs from separate single-trait Ridge regression models.

**Fig. S5.** Model comparison with 95% bootstrap confidence intervals for selected trait-dataset combinations (Arneberg SUMDM, Løken SUMDM, Quality Fordøy). Error bars represent 2.5th-97.5th percentile intervals from 20 bootstrap replicates.

Fig S1


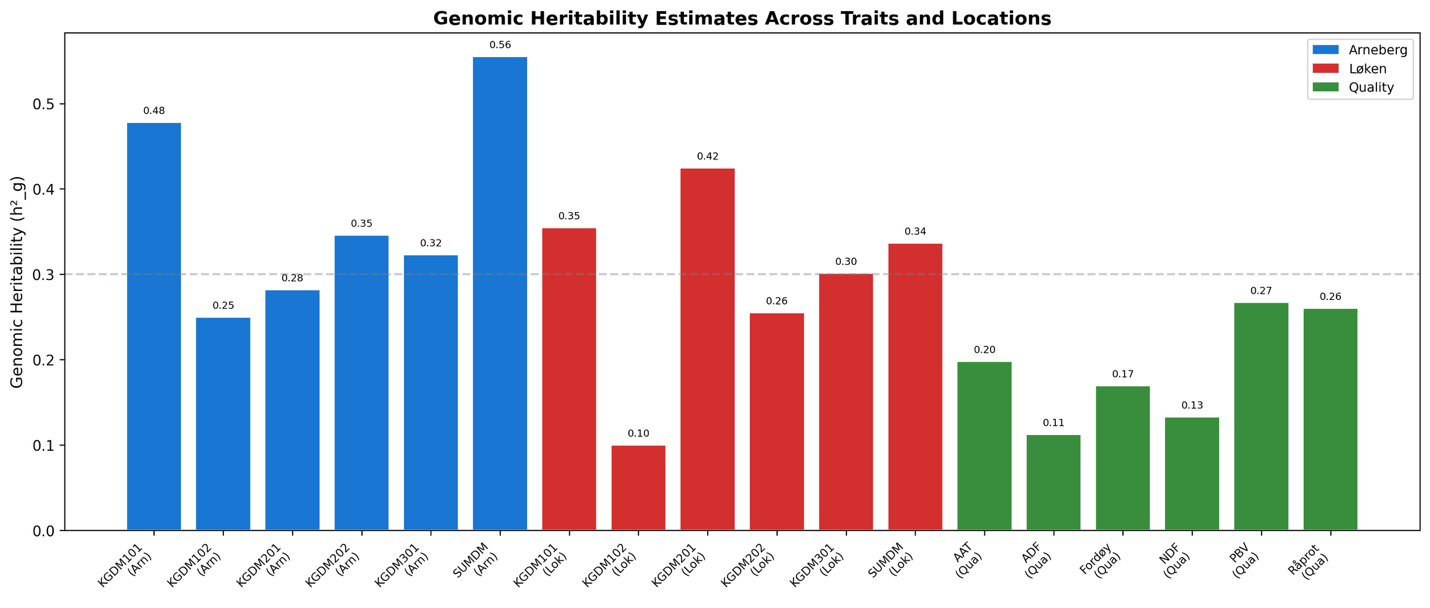


Fig S2.


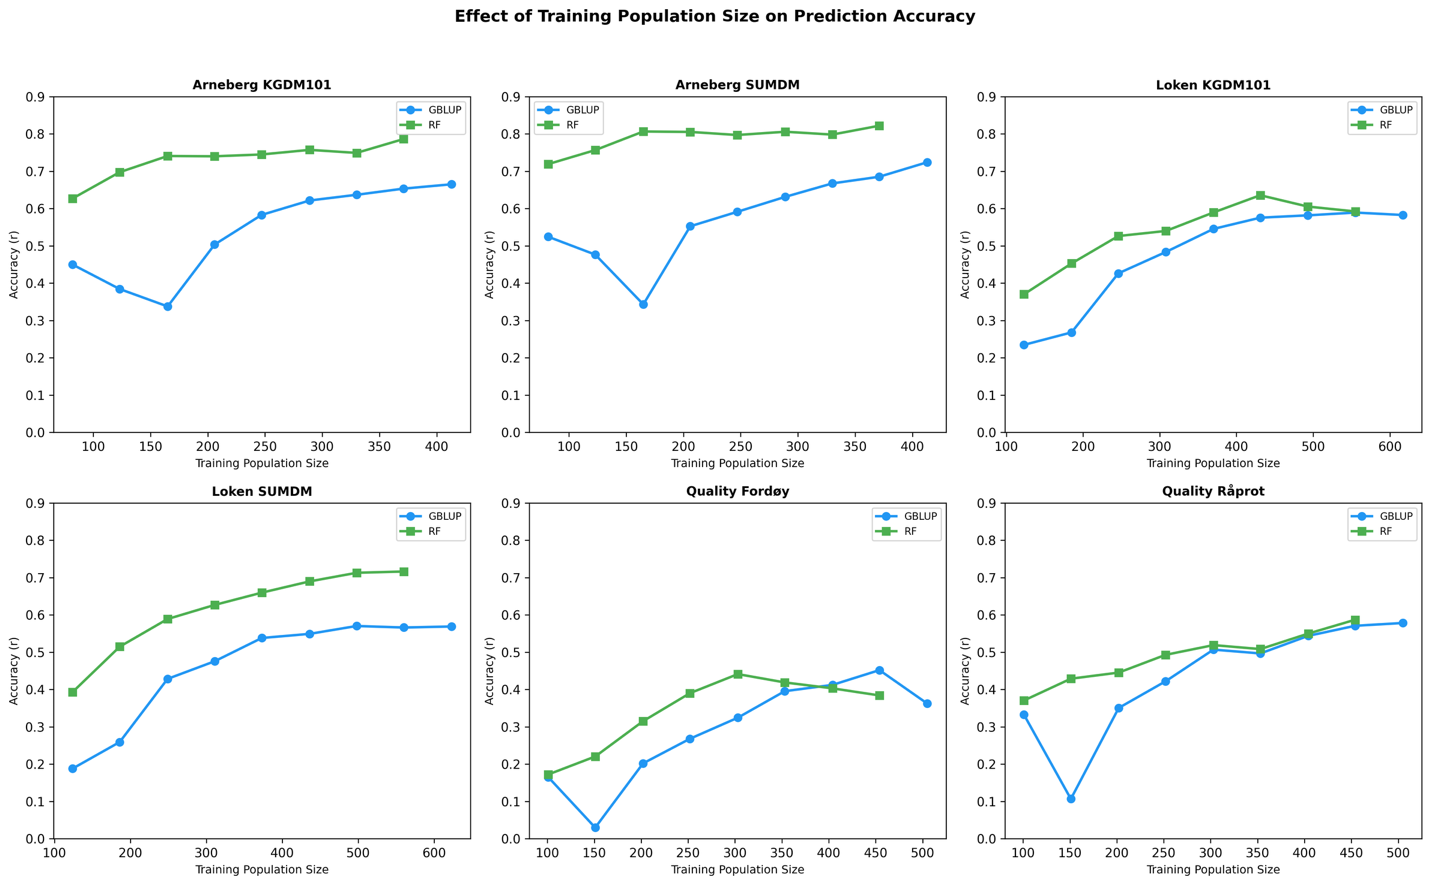


Fig S3


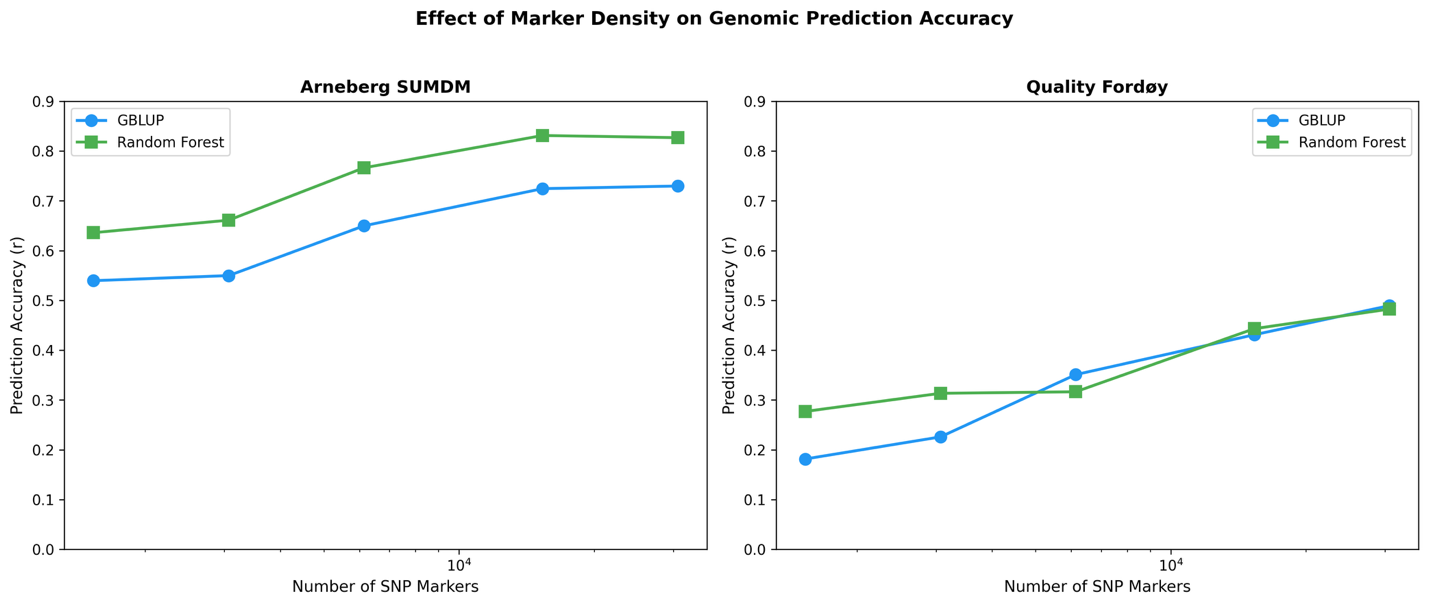


Fig S4


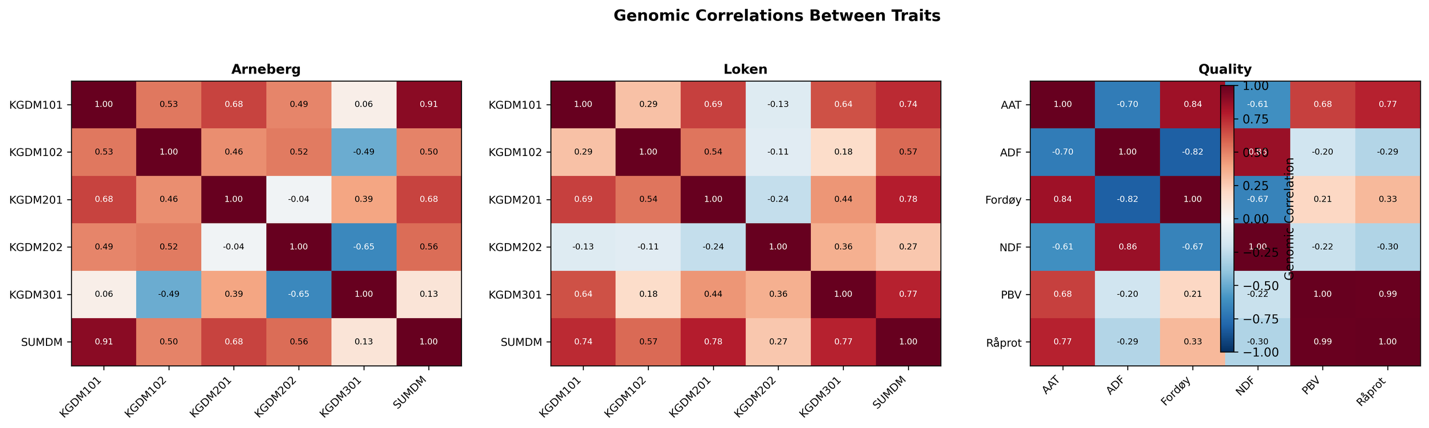


Fig S5


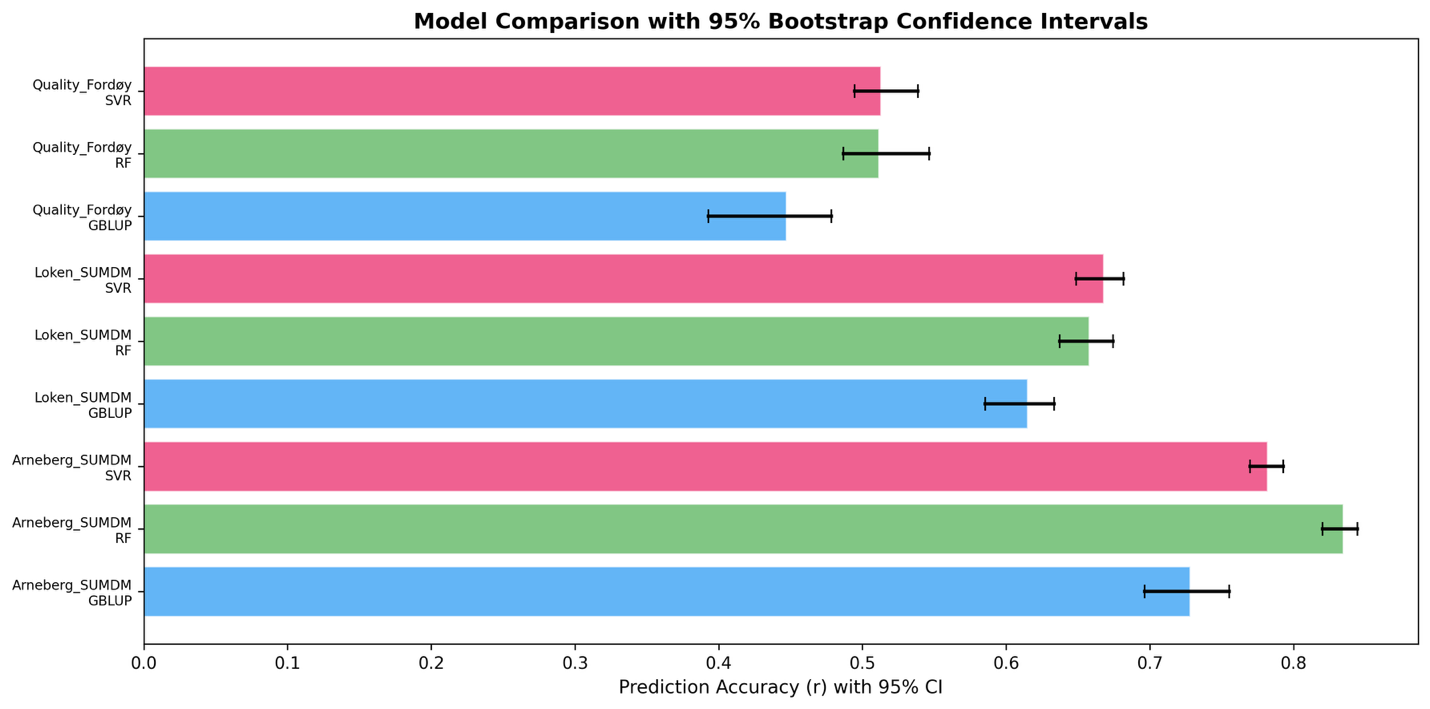

Supplement: Supplementary file 1 [file a6fdba3a4c5538b2e89fdf19.docx]
